# Supplementary figures and images for: A mindfulness-based group intervention to reduce psychological distress and fatigue in patients with inflammatory rheumatic joint diseases: a randomised controlled trial
Source: HighWire-hosted journal article supplement (doi:10.1136/annrheumdis-2011-200351), 2011-12-21

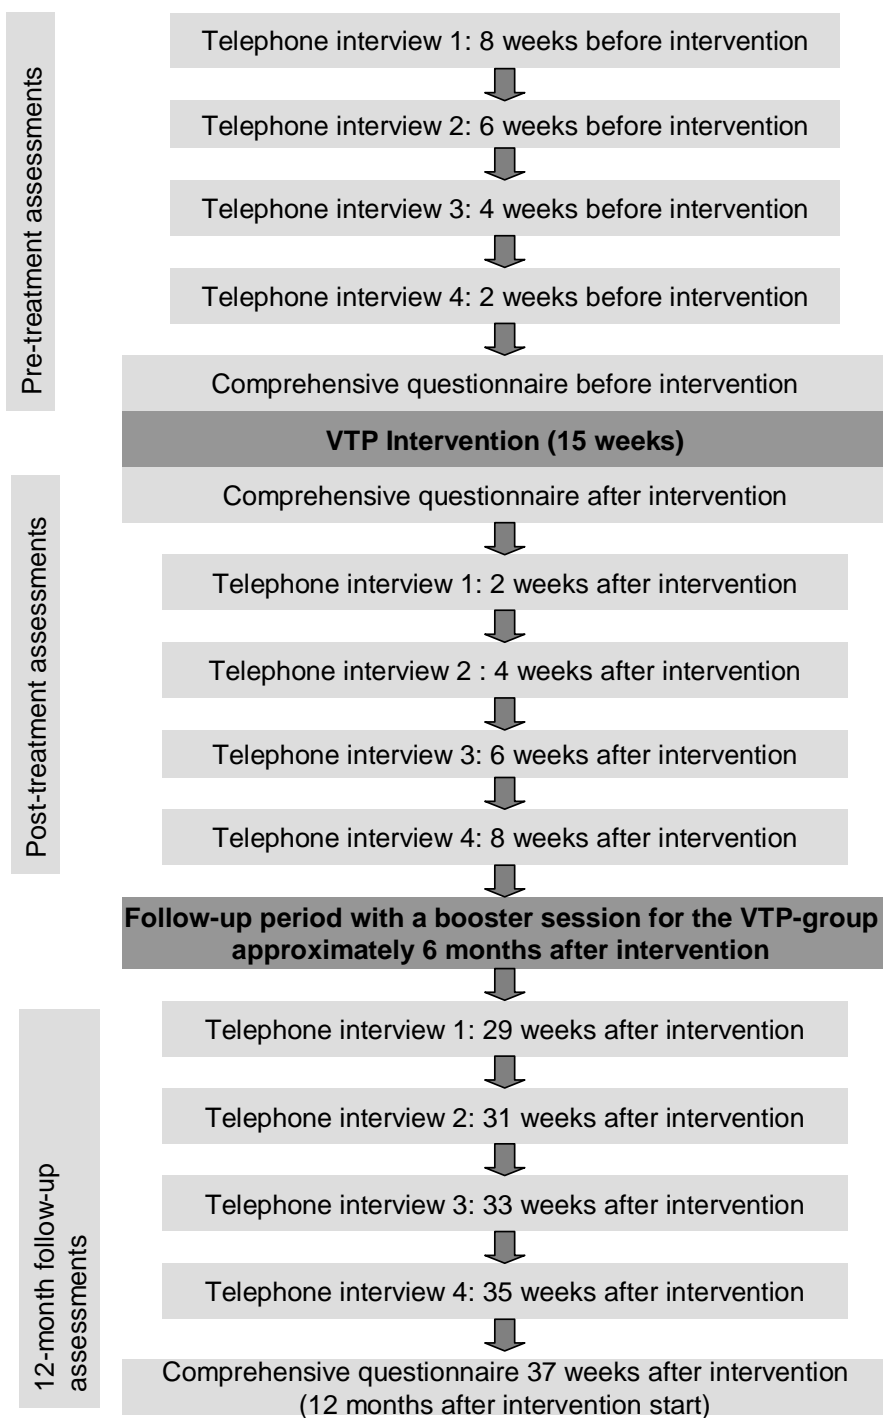

Figure S1: Flow chart of data collection

Supplement: annrheumdis-2011-200351_ds1.pdf [file annrheumdis-2011-200351_ds1.pdf]
